# Supplementary material for: Regional citrate versus heparin anticoagulation for continuous renal replacement therapy in critically ill patients: a meta-analysis with trial sequential analysis of randomized controlled trials
Source: Springer Nature journal article supplement (doi:10.1186/s13054-016-1299-0), 2016-05-12
Supplement: MOESM3 [file 10111806]

# Publication bias for the primary outcomes

**A** Begg's funnel plot with 95% confidence limits

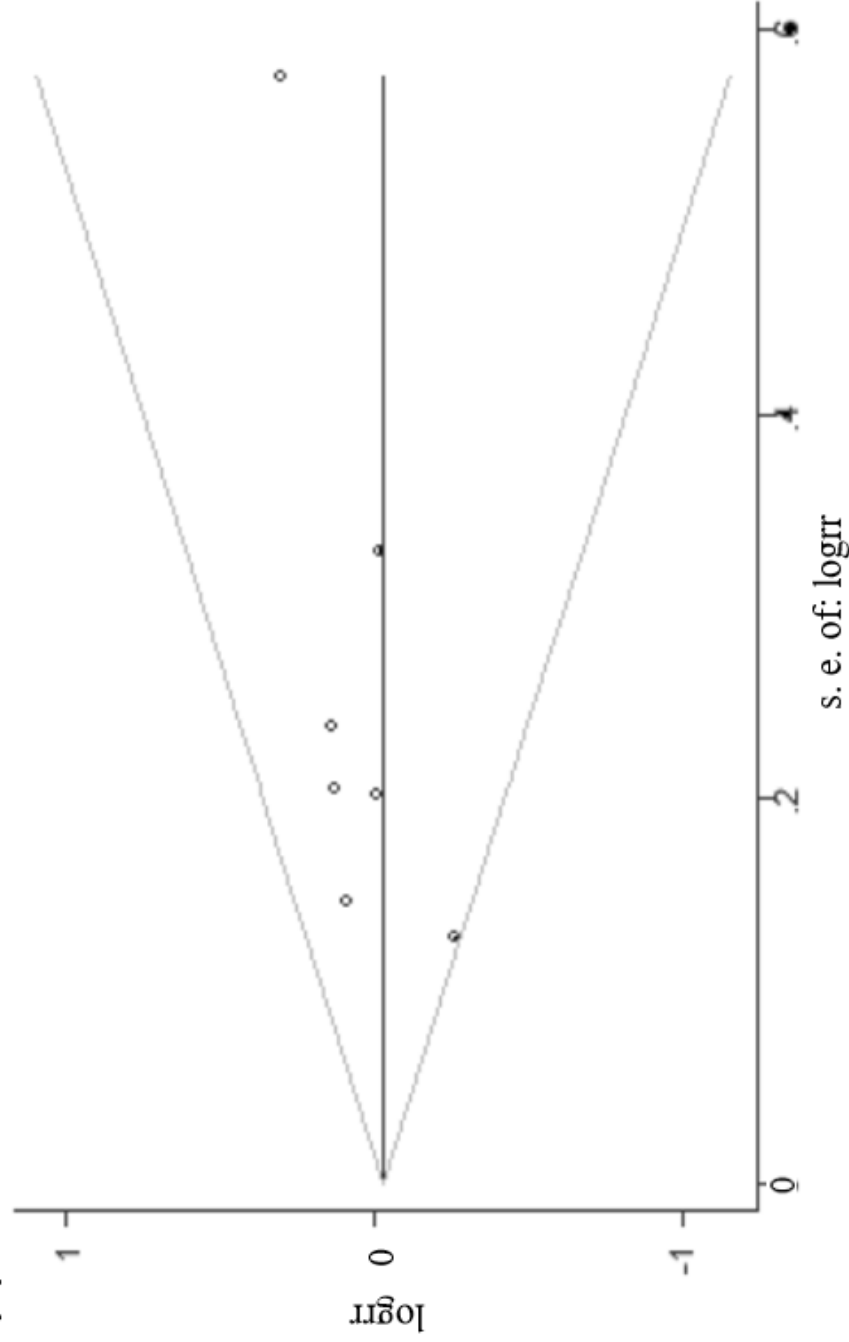

**B** Begg's funnel plot with pseudo 95% confidence limits

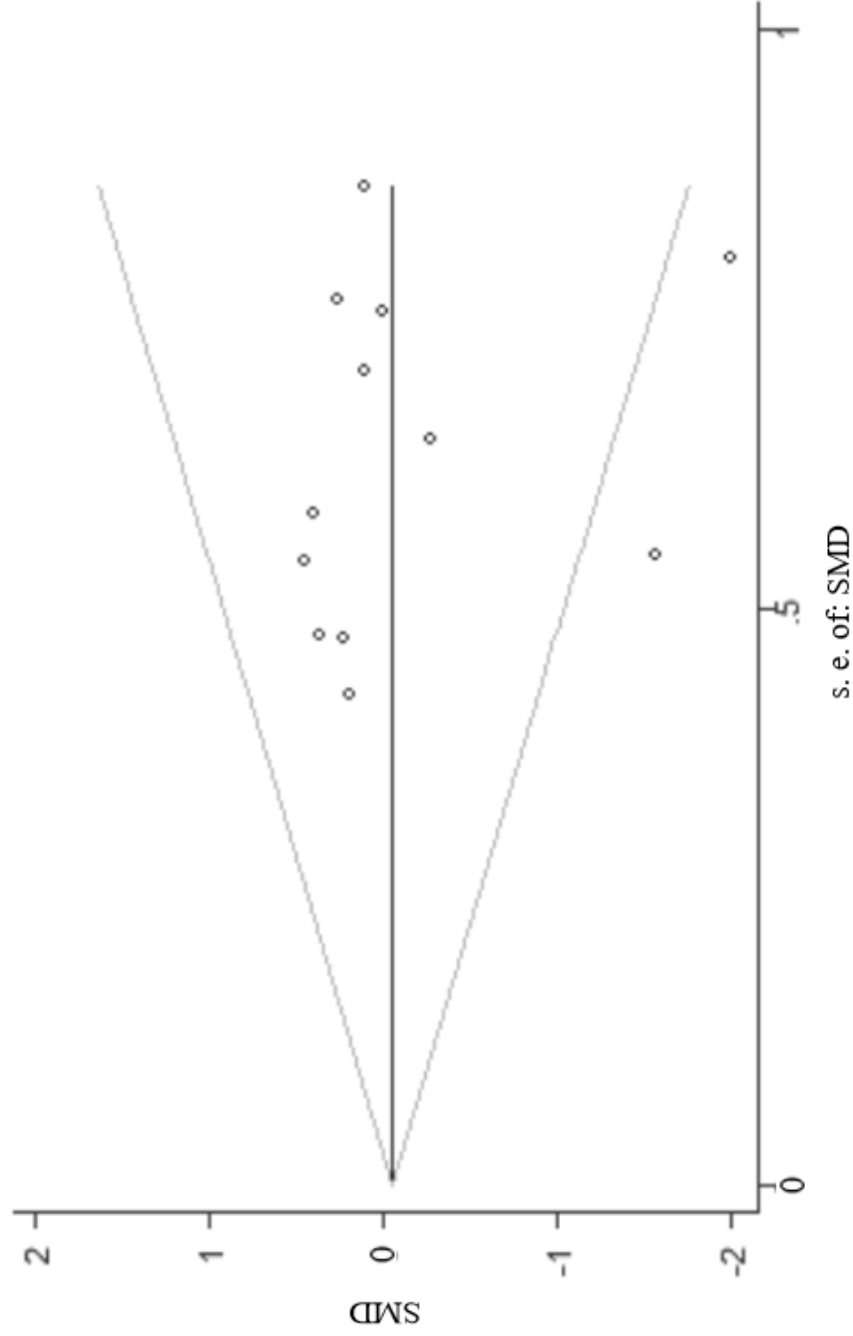

**A:** Begg's funnel plot for mortality; **B:** Begg's funnel plot for circuit life span.
